# Supplementary material for: Prenatal Exposures and Anti-Müllerian Hormone in Female Adolescents: The Avon Longitudinal Study of Parents and Children
Source: PubMed Central journal article supplement — Am J Epidemiol. 2013 Sep 5;178(9):1414–23. doi: 10.1093/aje/kwt137 (PMC3813311; doi:10.1093/aje/kwt137), 2013-09-05
Supplement: supp_kwt137_kwt137supp.pdf [file supp_kwt137_kwt137supp.pdf]

**Web Table 1. Characteristics of included participants and of the remaining original cohort**

|                                                | Included    |                                  | Remaining cohort |                                  | p-value |
|------------------------------------------------|-------------|----------------------------------|------------------|----------------------------------|---------|
|                                                | N with data | Mean (SD), Median (IQR) or % (N) | N with data      | Mean (SD), Median (IQR) or % (N) |         |
| <b>Parental characteristics</b>                |             |                                  |                  |                                  |         |
| Maternal age (years)                           | 1399        | 29.2 (4.5)                       | 5227             | 27.5 (5.0)                       | <0.001  |
| Paternal age (years)                           | 1049        | 31.3 (5.4)                       | 2906             | 30.2 (5.7)                       | <0.001  |
| Maternal smoking before pregnancy              | 1388        | 23.3 (324)                       | 4877             | 34.8 (1698)                      | <0.001  |
| Paternal smoking before pregnancy              | 1146        | 22.4 (257)                       | 3480             | 33.0 (1147)                      | <0.001  |
| Maternal smoking in pregnancy                  | 1327        | 13.3 (176)                       | 4261             | 26.1 (1111)                      | <0.001  |
| Paternal smoking in pregnancy                  | 1114        | 27.8 (310)                       | 3387             | 40.0 (1354)                      | <0.001  |
| No maternal alcohol intake                     | 1386        | 42.8 (593)                       | 4805             | 46.2 (2221)                      | 0.02    |
| No paternal alcohol intake                     | 1151        | 2.7 (31)                         | 3502             | 5.4 (189)                        | <0.001  |
| Maternal BMI (kg/m <sup>2</sup> )              | 1294        | 22.7 (3.6)                       | 4228             | 22.9 (3.9)                       | 0.03    |
| Paternal BMI (kg/m <sup>2</sup> )              | 1081        | 25.1 (3.3)                       | 2948             | 25.2 (3.3)                       | 0.16    |
| Manual household social class                  | 1399        | 13.4 (187)                       | 4088             | 21.4 (875)                       | <0.001  |
| <b>Fertility and pregnancy characteristics</b> |             |                                  |                  |                                  |         |
| Irregular                                      | 1375        | 20.4 (281)                       | 4541             | 20.7 (940)                       | 0.83    |

|                                      |      |             |      |             |        |
|--------------------------------------|------|-------------|------|-------------|--------|
| periods in past year                 |      |             |      |             |        |
| Seen doctor for possible infertility | 1374 | 12.5 (172)  | 4522 | 11.4 (514)  | 0.24   |
| >12 months to conception             | 1052 | 11.9 (125)  | 3271 | 11.6 (380)  | 0.82   |
| Parity 3+                            | 1364 | 3.6 (49)    | 4788 | 6.5 (309)   | <0.001 |
| Gestational weight gain (kg)         | 1285 | 12.5 (4.4)  | 4576 | 12.3 (4.8)  | 0.17   |
| Gestational age (weeks)              | 1399 | 39.6 (1.6)  | 5259 | 39.4 (2.5)  | <0.001 |
| Birth weight (g)                     | 1287 | 3393 (477)  | 4589 | 3329 (549)  | <0.001 |
| Size for gestational age             | 1287 |             | 4589 |             | 0.43   |
| SGA                                  |      | 11.3 (145)  |      | 12.1 (553)  |        |
| AGA                                  |      | 81.4 (1048) |      | 81.5 (3741) |        |
| LGA                                  |      | 7.3 (94)    |      | 6.4 (295)   |        |

\* P-value obtained from comparing logged values.

IQR – interquartile range, AMH – anti-Müllerian hormone, BMI – body mass index, SGA – small for gestational age, AGA – appropriate for gestational age, LGA – large for gestational age

**Web Table 2. Associations of maternal and paternal smoking in pregnancy with offspring AMH at age 15.**

|                                                                      | <b>Maternal</b>          |         | <b>Paternal</b>          |         |
|----------------------------------------------------------------------|--------------------------|---------|--------------------------|---------|
|                                                                      | Ratio of geometric means | p-value | Ratio of geometric means | p-value |
| <b>Smoking in the first trimester</b> (per smoking category) N=1066  |                          |         |                          |         |
| Model 1                                                              | 0.99 (0.96, 1.02)        | 0.58    |                          |         |
| Model 2                                                              | 0.99 (0.96, 1.02)        | 0.61    |                          |         |
| Model 3                                                              | 0.99 (0.96, 1.02)        | 0.66    |                          |         |
| <b>Smoking in the first trimester</b> (per smoking category) N=1066  |                          |         |                          |         |
| Model 1                                                              | 1.00 (0.96, 1.05)        | 1.00    | 0.97 (0.95, 0.99)        | 0.01    |
| Model 2                                                              | 1.00 (0.96, 1.05)        | 0.99    | 0.97 (0.95, 0.99)        | 0.01    |
| Model 3                                                              | 1.00 (0.96, 1.05)        | 0.91    | 0.97 (0.95, 0.99)        | 0.01    |
| <b>Smoking in the second trimester</b> (per smoking category) N=1066 |                          |         |                          |         |
| Model 1                                                              | 0.98 (0.94, 1.03)        | 0.41    | 0.97 (0.95, 1.00)        | 0.02    |
| Model 2                                                              | 0.98 (0.94, 1.03)        | 0.40    | 0.97 (0.95, 1.00)        | 0.02    |
| Model 3                                                              | 0.98 (0.94, 1.03)        | 0.49    | 0.97 (0.95, 1.00)        | 0.03    |
| <b>Smoking in the third trimester</b> (per smoking category*) N=1066 |                          |         |                          |         |
| Model 1                                                              | 0.98 (0.91, 1.06)        | 0.63    |                          |         |
| Model 2                                                              | 0.98 (0.91, 1.06)        | 0.63    |                          |         |
| Model 3                                                              | 0.98 (0.91, 1.06)        | 0.68    |                          |         |

Model 1 – Unadjusted

Model 2 – adjusted for maternal age and household social class.

Model 3 - adjusted for maternal age, household social class, gestational age, offspring pubertal stage and BMI.

Model 3 - adjusted for maternal age, household social class, gestational age, offspring pubertal stage, BMI and cotinine.

Smoking categories are 0, 1-4, 5-9, 10-14, 15-19, 20-24, 25-29, and 30+ cigarettes per day.

A ratio of geometric means is interpreted as relative (%) differences with a null value of 1.

\* Smoking categories are 0, 1-9, 10-19, and 20+ cigarettes per day.
